# Supplementary material
Source: ML conference proceedings conference paper supplement (https://proceedings.mlr.press/v119/huang20f.html)
Supplement: Supplementary file 1 [file huang20f-supp.pdf]

## A Main Theorem Proof

To reduce notation clutter we drop layer index  $l$  and re-state the theorem:

**Theorem 3.1.** Let  $G(\mathbf{m}, \mathbf{y}; \boldsymbol{\theta}_d) = \text{Attn}(\mathbf{m}, \mathbf{y}, \mathbf{m})$ , assuming that  $\|\partial\mathcal{L}/\partial G\| = \Theta(1)$ , then  $\Delta G \triangleq G\left(\mathbf{m} - \eta \frac{\partial\mathcal{L}}{\partial\mathbf{m}}, \mathbf{y}; \boldsymbol{\theta}_d - \eta \frac{\partial\mathcal{L}}{\partial\boldsymbol{\theta}_d}\right) - G(\mathbf{m}, \mathbf{y}; \boldsymbol{\theta}_d)$  satisfies  $\|\Delta G\| = \Theta(\eta/L_d)$  when:

$$\|v\|^2\|w\|^2 + \|w\|^2\|m_i\|^2 + \|v\|^2\|m_i\|^2 = \Theta(1/L_d)$$

for all  $i = 1, \dots, n$ .

*Proof.* Since we are only considering the magnitude of the update, it is sufficiently instructive to study the case where  $d = d' = 1$ . In this case the projection matrices reduce to scalars  $k, q, v, w \in \mathbb{R}$ , and  $\mathbf{m}$  is a  $n \times 1$  vector. Recall that for a single query  $y$  the attention block is defined as follows:

$$G(\mathbf{m}, y; \boldsymbol{\theta}_d) = \text{softmax}\left(\frac{1}{\sqrt{d}}yqk\mathbf{m}^T\right)\mathbf{m}vw$$

Let  $s_i = \frac{e^{\frac{km_i qy}{\sqrt{d}}}}{\sum_{j=1}^n e^{\frac{km_j qy}{\sqrt{d}}}}$  and  $\delta_{ij} = 0$  if  $i = j$  and 0 otherwise, we have:

$$\frac{\partial G}{\partial k} = \frac{1}{\sqrt{d}}vwqy \sum_{i=1}^n m_i s_i \left( m_i - \sum_{j=1}^n s_j m_j \right)$$

$$\frac{\partial G}{\partial y} = \frac{1}{\sqrt{d}}vwqk \sum_{i=1}^n m_i s_i \left( m_i - \sum_{j=1}^n s_j m_j \right)$$

$$\frac{\partial G}{\partial q} = \frac{1}{\sqrt{d}}vwyk \sum_{i=1}^n m_i s_i \left( m_i - \sum_{j=1}^n s_j m_j \right)$$

$$\frac{\partial G}{\partial v} = w \sum_{i=1}^n s_i m_i$$

$$\frac{\partial G}{\partial w} = v \sum_{i=1}^n s_i m_i$$

$$\begin{aligned} \frac{\partial G}{\partial m_i} &= vws_i + vw \sum_{j=1}^n \frac{\partial s_j}{\partial m_i} x_j \\ &= vws_i + vw \sum_{j=1}^n m_j s_j (\delta_{ji} - s_i) \frac{1}{\sqrt{d}}kqy \\ &= vws_i + \frac{1}{\sqrt{d}}vwkqys_i \left( m_i - \sum_{j=1}^n m_j s_j \right) \end{aligned}$$

Combining these expressions we get that the total change  $\Delta G$  is given by:

$$\begin{aligned} \Delta G &= \\ & - \eta \frac{\partial\mathcal{L}}{\partial G} \left( \frac{v^2 w^2}{d} \left( \sum_{i=1}^n s_i m_i \left( m_i - \sum_{j=1}^n s_j m_j \right) \right)^2 (q^2 y^2 + q^2 k^2 + y^2 k^2) + \left( \sum_{i=1}^n s_i m_i \right)^2 (w^2 + v^2) \right. \\ & \left. + v^2 w^2 \sum_{i=1}^n s_i^2 \left( 1 + \frac{1}{d} k^2 q^2 y^2 \left( m_i - \sum_{j=1}^n s_j m_j \right)^2 + \frac{1}{\sqrt{d}} k q y \left( m_i - \sum_{j=1}^n s_j m_j \right) \right) \right) \end{aligned}$$

By the assumption of the Theorem  $\|\eta \frac{\partial \mathcal{L}}{\partial G}\| = \Theta(\eta)$ , so we need to bound the term inside the main parentheses by  $\Theta(\frac{1}{L})$ . Note that  $s_i \geq 0$  and  $\sum s_i = 1$ , which implies that each summation with  $s$  and  $m$  is  $\Theta(m)$ . The desired magnitude  $\Theta(\frac{1}{L})$  is smaller than 1 so terms with lower power are leading:  $v^2 w^2, w^2 m_i^2, v^2 m_i^2$ . The result follows.  $\square$

## B Derivation of Sufficient Conditions

In Section 3.2 we set the goal to make model update bounded in magnitude independent of model depth:

**GOAL:**  $f(\mathbf{x}, \mathbf{y}; \boldsymbol{\theta})$  is updated by  $\Theta(\eta)$  per optimization step as  $\eta \rightarrow 0$ . That is,  $\|\Delta f\| = \Theta(\eta)$ , where  $\Delta f \triangleq f\left(\mathbf{x} - \eta \frac{\partial \mathcal{L}}{\partial \mathbf{x}}, \mathbf{y} - \eta \frac{\partial \mathcal{L}}{\partial \mathbf{y}}; \boldsymbol{\theta} - \eta \frac{\partial \mathcal{L}}{\partial \boldsymbol{\theta}}\right) - f(\mathbf{x}, \mathbf{y}; \boldsymbol{\theta})$ .

To achieve this, we study the forward and backward passes. Given the encoder  $f_e$  and decoder  $f_d$ , the Transformer model can be written as  $f(\mathbf{x}, \mathbf{y}; \boldsymbol{\theta}) = f_d(\mathbf{m}, \mathbf{y}; \boldsymbol{\theta}_d)$  where  $\mathbf{m} = f_e(\mathbf{x}; \boldsymbol{\theta}_e)$  is the memory output of the encoder. The total change after model update is then given by:

$$\Delta f = \Delta f_d \stackrel{\text{def}}{=} f_d\left(\tilde{\mathbf{m}}, \mathbf{y} - \eta \frac{\partial \mathcal{L}}{\partial \mathbf{y}}; \boldsymbol{\theta}_d - \eta \frac{\partial \mathcal{L}}{\partial \boldsymbol{\theta}_d}\right) - f_d(\mathbf{m}, \mathbf{y}; \boldsymbol{\theta}_d)$$

where  $\tilde{\mathbf{m}} = f_e\left(\mathbf{x} - \eta \frac{\partial \mathcal{L}}{\partial \mathbf{x}}; \boldsymbol{\theta}_e - \eta \frac{\partial \mathcal{L}}{\partial \boldsymbol{\theta}_e}\right)$  is the updated memory. Analogous to Zhang et al. (2019b), without loss of generality, we make the following assumptions to simplify derivations:

1. All relevant weights are positive with magnitude less than 1.
2. Encoder and decoder have the same number of layers  $N$ , with  $L_e = 2N$  and  $L_d = 3N$  blocks in the encoder and decoder respectively.
3. Embedding dimension  $d$  is 1 and the size of the input encoder sequence is  $n$ .
4. Derivative of  $f$  with respect to the loss function  $\frac{\partial \mathcal{L}}{\partial f_d}$  is of order  $\Theta(1)$

**Forward Pass** The Transformer encoder consists of  $L_e$  residual blocks  $G_1, \dots, G_{L_e}$  alternating between self-attention and MLP blocks. Let  $\mathbf{x}_1 = \mathbf{x}$  and  $\mathbf{x}_{l+1} = \mathbf{x}_l + G_l(\mathbf{x}_l, \boldsymbol{\theta}_{el})$  denote the output of the  $l$ -th block such that  $\mathbf{m} = \mathbf{x}_{L_e}$ . When  $l$  is odd,  $G_l$  is a self-attention block with parameters  $\boldsymbol{\theta}_{el} = \{k_{el}, q_{el}, v_{el}, w_{el}\}$ , and when  $l$  is even  $G_l$  is an MLP with parameters  $\boldsymbol{\theta}_{el} = \{v_{el}, w_{el}\}$ . We have:

$$\begin{aligned} \mathbf{x}_{l+1} &\stackrel{\ominus}{=} \mathbf{x}_l + v_{el} w_{el} \mathbf{x}_l \\ \mathbf{x}_l &\stackrel{\ominus}{=} \mathbf{x} \left( 1 + \sum_{i=1}^l v_{ei} w_{ei} \right) \\ \mathbf{m} &\stackrel{\ominus}{=} \mathbf{x} \left( 1 + \sum_{l=1}^{L_e} v_{el} w_{el} \right) \end{aligned}$$

The decoder computation is similar with the addition of encoder-attention blocks:

$$\begin{aligned} \mathbf{y}_2 &= \mathbf{y}_1 + G_1(\mathbf{y}_1; \boldsymbol{\theta}_{d1}) \\ \mathbf{y}_3 &= \mathbf{y}_2 + G_2(\mathbf{m}, \mathbf{y}_2; \boldsymbol{\theta}_{d2}) \\ \mathbf{y}_4 &= \mathbf{y}_3 + G_3(\mathbf{y}_3; \boldsymbol{\theta}_{d3}) \\ &\vdots \\ f_d(\mathbf{m}, \mathbf{y}; \boldsymbol{\theta}_d) &= \mathbf{y}_{L_d} + G_{L_d}(\mathbf{y}_{L_d}; \boldsymbol{\theta}_{dL_d}) \end{aligned}$$

where  $\mathbf{y}_1 = \mathbf{y}$ . When  $l \% 3 \neq 0$ ,  $G_l$  is an attention block with parameters  $\boldsymbol{\theta}_{dl} = \{k_{dl}, q_{dl}, v_{dl}, w_{dl}\}$ . Otherwise,  $G_l$  is an MLP with parameters  $\boldsymbol{\theta}_{dl} = \{v_{dl}, w_{dl}\}$ . We have:

$$\begin{aligned}\mathbf{y}_2 &\stackrel{\ominus}{=} \mathbf{y}_1 + v_{d1}w_{d1}\mathbf{y}_1 \\ \mathbf{y}_3 &\stackrel{\ominus}{=} \mathbf{y}_2 + v_{d2}w_{d2}\mathbf{m} \\ \mathbf{y}_4 &\stackrel{\ominus}{=} \mathbf{y}_3 + v_{d3}w_{d3}\mathbf{y}_3 \\ &\vdots \\ f(\mathbf{m}, \mathbf{y}; \boldsymbol{\theta}_d) &\stackrel{\ominus}{=} \mathbf{y}_{L_d} + v_{dL_d}w_{dL_d}\mathbf{x}_{L_d}\end{aligned}$$

from which it follows that  $\mathbf{y}_l \stackrel{\ominus}{=} \mathbf{y} \left(1 + \sum_{\substack{i=1 \\ i \% 2 \neq 2}}^l v_{di}w_{di}\right) + \mathbf{m} \sum_{\substack{i=1 \\ i \% 2 = 2}}^l v_{di}w_{di}$ .

**Backward Pass** With  $\boldsymbol{\theta}_E = \{\mathbf{x}, \boldsymbol{\theta}_e\}$  and  $\boldsymbol{\theta}_D = \{\mathbf{x}, \boldsymbol{\theta}_d\}$  denoting full encoder and decoder parameters (including input embeddings), by Taylor expansion we have:

$$\begin{aligned}\Delta f &= \frac{\partial f}{\partial \boldsymbol{\theta}_D} \Delta \boldsymbol{\theta}_D + \frac{\partial f}{\partial \boldsymbol{\theta}_E} \Delta \boldsymbol{\theta}_E + O(\|\Delta \boldsymbol{\theta}_D\|^2 + \|\Delta \boldsymbol{\theta}_E\|^2) \\ &= \frac{\partial f}{\partial \boldsymbol{\theta}_d} \Delta \boldsymbol{\theta}_d + \frac{\partial f}{\partial \boldsymbol{\theta}_e} \Delta \boldsymbol{\theta}_e + \frac{\partial f}{\partial \mathbf{x}} \Delta \mathbf{x} + \frac{\partial f}{\partial \mathbf{y}} \Delta \mathbf{y} + O(\eta^2) \\ &= -\eta \frac{\partial f_d}{\partial \boldsymbol{\theta}_d} \frac{\partial f_d}{\partial \boldsymbol{\theta}_d}^T \frac{\partial \mathcal{L}}{\partial f_d}^T - \eta \frac{\partial f_d}{\partial f_e} \frac{\partial f_e}{\partial \boldsymbol{\theta}_e} \frac{\partial f_e}{\partial \boldsymbol{\theta}_e}^T \frac{\partial f_d}{\partial f_e}^T \frac{\partial \mathcal{L}}{\partial f_d}^T - \eta \frac{\partial f_d}{\partial \mathbf{y}} \frac{\partial f_d}{\partial \mathbf{y}}^T \frac{\partial \mathcal{L}}{\partial f_d}^T \\ &\quad - \eta \frac{\partial f_d}{\partial f_e} \frac{\partial f_e}{\partial \mathbf{x}} \frac{\partial f_e}{\partial \mathbf{x}}^T \frac{\partial f_d}{\partial f_e}^T \frac{\partial \mathcal{L}}{\partial f_d}^T + O(\eta^2)\end{aligned}\tag{1}$$

Note that to reach our goal, it is sufficient for each of the terms to be of order  $\Theta(\eta)$ . We derive necessary conditions to achieve that by studying each partial derivative in Equation 1 and its contribution to  $\Delta f$ . By assumption 4 we have that  $\frac{\partial \mathcal{L}}{\partial f_d} \stackrel{\ominus}{=} 1$ . From the additive block-based architecture of the encoder:

$$f_e(\mathbf{x}; \boldsymbol{\theta}_e) = \mathbf{x}_1 + G_1(\mathbf{x}_1; \boldsymbol{\theta}_{e1}) + G_2(\mathbf{x}_2; \boldsymbol{\theta}_{e2}) + \dots + G_{L_e}(\mathbf{x}_{L_e}; \boldsymbol{\theta}_{eL_e})$$

we have that:

$$\begin{aligned}\frac{\partial f_e}{\partial \mathbf{x}} &= \frac{\partial \mathbf{x}_2}{\partial \mathbf{x}} + \frac{\partial G_2(\mathbf{x}_2; \boldsymbol{\theta}_{e2})}{\partial \mathbf{x}_2} \frac{\partial \mathbf{x}_2}{\partial \mathbf{x}} + \dots + \frac{\partial G_{L_e}(\mathbf{x}_{L_e}; \boldsymbol{\theta}_{eL_e})}{\partial \mathbf{x}_{L_e}} \dots \frac{\partial \mathbf{x}_2}{\partial \mathbf{x}} \\ &\stackrel{\ominus}{=} 1 + \frac{\partial G_1(\mathbf{x}; \boldsymbol{\theta}_{e1})}{\partial \mathbf{x}}\end{aligned}$$

so derivative magnitude is independent of the model depth. Following analogous derivation for  $\frac{\partial f_e}{\partial \boldsymbol{\theta}_e}$  we get that for each layer  $l$ :

$$\begin{aligned}\frac{\partial f_e}{\partial \boldsymbol{\theta}_{el}} &= \frac{\partial G_l(\mathbf{x}_l; \boldsymbol{\theta}_{el})}{\partial \boldsymbol{\theta}_{el}} \\ &\quad + \frac{\partial G_{l+1}(\mathbf{x}_{l+1}; \boldsymbol{\theta}_{e(l+1)})}{\partial \mathbf{x}_{l+1}} \frac{\partial G_l(\mathbf{x}_l; \boldsymbol{\theta}_{el})}{\partial \boldsymbol{\theta}_{el}} \\ &\quad + \dots \\ &\quad + \frac{\partial G_{L_e}(\mathbf{x}_{L_e}; \boldsymbol{\theta}_{eL_e})}{\partial \mathbf{x}_{L_e}} \dots \frac{\partial G_l(\mathbf{x}_l; \boldsymbol{\theta}_{el})}{\partial \boldsymbol{\theta}_{el}} \\ &\stackrel{\ominus}{=} \frac{\partial G_l(\mathbf{x}_l; \boldsymbol{\theta}_{el})}{\partial \boldsymbol{\theta}_{el}}\end{aligned}$$

And it follows that the magnitude of  $\frac{\partial f_e}{\partial \boldsymbol{\theta}_e}$  is bound by:

$$\frac{\partial f_e}{\partial \boldsymbol{\theta}_e} \stackrel{\ominus}{=} \left( \frac{\partial G_1(\mathbf{x}_1; \boldsymbol{\theta}_{e1})}{\partial \boldsymbol{\theta}_{e1}}, \frac{\partial G_2(\mathbf{x}_2; \boldsymbol{\theta}_{e2})}{\partial \boldsymbol{\theta}_{e2}}, \dots, \frac{\partial G_{L_e}(\mathbf{x}_{L_e}; \boldsymbol{\theta}_{eL_e})}{\partial \boldsymbol{\theta}_{eL_e}} \right)$$

with the corresponding inner product:

$$\frac{\partial f_e}{\partial \theta_e} \frac{\partial f_e}{\partial \theta_e}^T \stackrel{\ominus}{=} \sum_{l=1}^{L_e} \frac{\partial G_l(\mathbf{x}_l; \theta_{el})}{\partial \theta_{el}} \frac{\partial G_l(\mathbf{x}_l; \theta_{el})^T}{\partial \theta_{el}} \quad (2)$$

Similar analysis for the decoder gives:

$$\frac{\partial f_d}{\partial \theta_d} \frac{\partial f_d}{\partial \theta_d}^T \stackrel{\ominus}{=} \sum_{\substack{l=1 \\ l \% 3 \neq 2}}^{L_d} \frac{\partial G_l(\mathbf{y}_l; \theta_{dl})}{\partial \theta_{dl}} \frac{\partial G_l(\mathbf{y}_l; \theta_{dl})^T}{\partial \theta_{dl}} + \sum_{\substack{l=1 \\ l \% 3 = 2}}^{L_d} \frac{\partial G_l(\mathbf{m}, \mathbf{y}_l; \theta_{dl})}{\partial \theta_{dl}} \frac{\partial G_l(\mathbf{m}, \mathbf{y}_l; \theta_{dl})^T}{\partial \theta_{dl}} \quad (3)$$

Finally, the order of the term  $\frac{\partial f_d}{\partial f_e} \frac{\partial f_e}{\partial \theta_e} \frac{\partial f_e}{\partial \theta_e}^T \frac{\partial f_d}{\partial f_e}^T$  in Equation 1 depends on  $\frac{\partial f_e}{\partial \theta_e} \frac{\partial f_e}{\partial \theta_e}^T$  and  $\frac{\partial f_d}{\partial f_e} \frac{\partial f_d}{\partial f_e}^T$ . Since encoder and decoder are linked by memory, we have:

$$\frac{\partial f_d}{\partial f_e} \frac{\partial f_d}{\partial f_e}^T \stackrel{\ominus}{=} \sum_{\substack{l=1 \\ l \% 3 = 2}}^{L_d} \frac{\partial G_l(\mathbf{m}, \mathbf{y}_l; \theta_{dl})}{\partial \mathbf{m}} \frac{\partial G_l(\mathbf{m}, \mathbf{y}_l; \theta_{dl})^T}{\partial \mathbf{m}} \quad (4)$$

Equations 2, 3 and 4 cover all the major terms in the total change  $\Delta f$ , so we focus on them to derive the target bound. Expanding the terms in Equation 2 and applying Theorem 3.1 we get the following:

$$\begin{aligned} \frac{\partial f_e}{\partial \theta_e} \frac{\partial f_e}{\partial \theta_e}^T &\stackrel{\ominus}{=} \sum_{l=1}^{L_e} \frac{\partial G_l(\mathbf{x}_l; \theta_{el})}{\partial \theta_{el}} \frac{\partial G_l(\mathbf{x}_l; \theta_{el})^T}{\partial \theta_{el}} + \frac{\partial G_l(\mathbf{x}_l; \theta_{el})}{\partial \mathbf{x}_l} \frac{\partial G_l(\mathbf{x}_l; \theta_{el})^T}{\partial \mathbf{x}_l} \\ &\stackrel{\ominus}{=} \sum_{l=1}^{L_e} (v_{el}^2 + w_{el}^2) \mathbf{x}_l \mathbf{x}_l^T + v_{el}^2 w_{el}^2 \mathbf{1}_{m \times m} \\ &\stackrel{\ominus}{=} \sum_{l=1}^{L_e} (v_{el}^2 + w_{el}^2) \left( 1 + \sum_{i=1}^l v_{ei} w_{ei} \right)^2 \mathbf{x} \mathbf{x}^T + v_{el}^2 w_{el}^2 \mathbf{1}_{m \times m} \end{aligned} \quad (5)$$

Similarly, expanding Equation 3 we get:

$$\frac{\partial f_d}{\partial \theta_d} \frac{\partial f_d}{\partial \theta_d}^T \stackrel{\ominus}{=} \sum_{\substack{l=1 \\ l \% 3 \neq 2}}^{L_d} ((v_{dl}^2 + w_{dl}^2) \mathbf{y}_l \mathbf{y}_l^T + v_{dl}^2 w_{dl}^2 \mathbf{1}_{n \times n}) + \sum_{\substack{l=1 \\ l \% 3 = 2}}^{3N} ((v_{dl}^2 + w_{dl}^2) \mathbf{m}^T \mathbf{m} + v_{dl}^2 w_{dl}^2) \mathbf{1}_{n \times n} \quad (6)$$

And finally for Equation 4 we have:

$$\frac{\partial f_d}{\partial f_e} \frac{\partial f_d}{\partial f_e}^T \stackrel{\ominus}{=} \sum_{\substack{l=1 \\ l \% 3 = 2}}^{L_d} v_{dl}^2 w_{dl}^2 \mathbf{1}_{n \times n} \quad (7)$$

To achieve the target goal it is sufficient to make Equations 5, 6 and 7 of order  $\Theta(1)$ . Assuming that all weights are initialized to the same order of magnitude ( $v_{el} = \Theta(v_e)$ ,  $w_{el} = \Theta(w_e)$  etc., for all  $l$ ), the sufficient condition for Equation 5 can be derived as follows:

$$\begin{aligned} 1 &\stackrel{\ominus}{=} \sum_{l=1}^{L_e} (v_{el}^2 + w_{el}^2) \left( 1 + \sum_{i=1}^l v_{ei} w_{ei} \right)^2 x^2 + v_{el}^2 w_{el}^2 \\ &\stackrel{\ominus}{=} L_e \left( (v_e^2 + w_e^2) \left( 1 + \sum_{i=1}^l v_e w_e \right)^2 x^2 + v_e^2 w_e^2 \right) \\ &\stackrel{\ominus}{=} L_e (\|v_e\|^2 \|x\|^2 + \|w_e\|^2 \|x\|^2 + \|v_e\|^2 \|w_e\|^2) \end{aligned} \quad (8)$$

Similar derivation for Equation 6 gives:

$$L_d(\|v_d\|^2\|w_d\|^2 + \|v_d\|^2\|y\|^2 + \|w_d\|^2\|y\|^2 + \|v_d\|^2\|w_d\|^2 + \|v_d\|^2\|m\|^2 + \|w_d\|^2\|m\|^2) \stackrel{\ominus}{=} 1 \quad (9)$$

And for Equation 7 we have:

$$L_d(\|v_d\|^2\|w_d\|^2) \stackrel{\ominus}{=} 1 \quad (10)$$

## C Encoder Initialization

Recall that  $L_e = 2N$  and  $L_d = 3N$ , substituting these into gradient expressions for the encoder and decoder we get:

$$\begin{aligned} \frac{\partial f_e}{\partial \theta_e} \frac{\partial f_e}{\partial \theta_e}^T &\stackrel{\ominus}{=} 2N((v_e^2 + w_e^2)(1 + 2Nv_e w_e)^2 \mathbf{x}\mathbf{x}^T + v_e^2 w_e^2 \mathbf{1}_{m \times m}) \\ \frac{\partial f_d}{\partial \theta_d} \frac{\partial f_d}{\partial \theta_d}^T &\stackrel{\ominus}{=} 2N((v_d^2 + w_d^2)\mathbf{y}\mathbf{y}^T + v_d^2 w_d^2 \mathbf{1}_{n \times n}) + N((v_d^2 + w_d^2)\mathbf{m}^T \mathbf{m} + v_d^2 w_d^2) \mathbf{1}_{n \times n} \\ \frac{\partial f_d}{\partial f_e} \frac{\partial f_d}{\partial f_e}^T &\stackrel{\ominus}{=} 3Nv_d^2 w_d^2 \mathbf{1}_{n \times n} \end{aligned}$$

Note that if  $\|v_e\|\|w_e\| < \Theta(1/N)$  then  $\|\mathbf{m}\| \stackrel{\ominus}{=} \|\mathbf{x}\|$ . With this in mind, we let  $\|v_d\| \stackrel{\ominus}{=} \|w_d\| \stackrel{\ominus}{=} \|\mathbf{y}\| \stackrel{\ominus}{=} \|\mathbf{x}\| \stackrel{\ominus}{=} (9N)^{-\frac{1}{4}}$ , which by design gives:

$$\begin{aligned} \frac{\partial f_e}{\partial \theta_e} \frac{\partial f_e}{\partial \theta_e}^T &\stackrel{\ominus}{=} 2N((v_e^2 + w_e^2)(9N)^{-\frac{1}{4}} + v_e^2 w_e^2) \mathbf{1}_{m \times m} \\ \frac{\partial f_d}{\partial \theta_d} \frac{\partial f_d}{\partial \theta_d}^T &\stackrel{\ominus}{=} 2N((3(9N)^{-1}) + N(3(9N)^{-1}) \mathbf{1}_{n \times n}) \stackrel{\ominus}{=} \mathbf{1}_{n \times n} \\ \frac{\partial f_d}{\partial f_e} \frac{\partial f_d}{\partial f_e}^T &\stackrel{\ominus}{=} 3N(9N)^{-1} \stackrel{\ominus}{=} \mathbf{1}_{n \times n} \end{aligned}$$

We then solve for the magnitude of  $v_e$  and  $w_e$  that achieves  $\frac{\partial f_e}{\partial \theta_e} \frac{\partial f_e}{\partial \theta_e}^T \stackrel{\ominus}{=} \mathbf{1}_{m \times m}$ . Assuming that  $\|v_e\| = \|w_e\|$  due to symmetry, we obtain  $\|v_e\| = \|w_e\| = \left(\frac{\sqrt{22}-2}{6}\right)^{\frac{1}{2}} N^{-\frac{1}{4}} \approx 0.67N^{-\frac{1}{4}}$ .

## D Training Hyper-Parameters

| Parameters             | IWSLT'14 <sub>small</sub> | WMT'18 <sub>base</sub> | WMT'17 <sub>base</sub> | WMT'17 <sub>deep</sub> | WMT'17 <sub>big</sub> |
|------------------------|---------------------------|------------------------|------------------------|------------------------|-----------------------|
|                        | De-En                     | Fi-En                  | En-De                  | En-De                  | En-De                 |
| Starting learning rate | 0.0005                    | 0.0006                 | 0.0007                 | 0.0004                 | 0.0004                |
| Decay steps            | 4000                      | 4000                   | 4000                   | 4000                   | 4000                  |
| Dropout                | 0.5                       | 0.4                    | 0.2                    | 0.4                    | 0.4                   |
| Batch size (tokens)    | 4k                        | 80k                    | 25k                    | 25k                    | 25k                   |
| Max updates            | 300k                      | 90k                    | 1M                     | 500k                   | 500k                  |
| Mixed precision        | No                        | No                     | No                     | Yes                    | Yes                   |

Table 1: Hyper-parameters for T-Fixup models on each dataset.
